# Supplementary material
Source: HighWire-hosted journal article supplement (https://adc.bmj.com/content/archdischild-2021-323765)
Supplement: inline-supplementary-material-1 [file inline-supplementary-material-1.pdf]

## Supplement 1. Search strategy and keywords

### Ovid Medline

1. exp vitamin D [MESH]
2. exp vitamin D deficiency [MESH]
3. (cholecalciferol\* or coilecalciferol\* or Hydroxyvitamin-D\* or calcifediol\* or calciferol\* or ergocalciferol\* or vitamin-d\* or avitaminosis-d\* or Hydroxycholecalciferol\* or Dihydroxycholecalciferol\* or Dihydroxyvitamin-D\* or Dihydrotachysterol\*).tw,kf.
4. 1 or 2 or 3
5. exp Asia, Southeastern [MESH]
6. ((south-east\* or southeast\*) adj Asia).tw,kf.
7. (brunei or burma or cambodia or east-timor or indonesia or indochina or indochine\* or lao\* or malaysia or mekong or myanmar or singapore or thailand or timor-leste or vietnam or viet-nam).tw,kf.
8. asean.tw,kf.
9. 5 or 6 or 7 or 8
10. (newborn\* or new-born\* or baby or babies or neonat\* or neo-nat\* or infan\* or toddler\* or pre-schooler\* or preschooler\* or kinder or kinders or kindergarten\* or kinder-aged or boy or boys or girl or girls or child or children or childhood or pediatric\* or paediatric\* or adolescen\* or youth or youths or teen or teens or teenage\* or school-age\* or schoolage\* or school-child\* or schoolchild\* or school-girl\* or schoolgirl\* or school-boy\* or schoolboy\*).af.
11. 4 and 9 and 10
12. limit 11 to English language
13. limit 12 to (case reports or comment or editorial or guideline or letter or practice guideline)
14. 12 not 13

### Ovid Embase

1. vitamin d/ or 24,25 dihydroxyvitamin d/ or 25 hydroxyvitamin d/ or exp coilecalciferol derivative/ or exp ergocalciferol derivative/
2. vitamin D deficiency/
3. (cholecalciferol\* or coilecalciferol\* or Hydroxyvitamin-D\* or calcifediol\* or calciferol\* or ergocalciferol\* or vitamin-d\* or avitaminosis-d\* or Hydroxycholecalciferol\* or Dihydroxycholecalciferol\* or Dihydroxyvitamin-D\* or Dihydrotachysterol\*).tw,kw,dq.
4. 1 or 2 or 3
5. exp Southeast Asia/
6. ((south-east\* or southeast\*) adj Asia).tw,kw,dq.

7. (brunei or burma or cambodia or east-timor or indonesia or indochina or indochine\* or lao\* or malaysia or mekong or myanmar or singapore or thailand or timor-leste or vietnam or viet-nam).tw,kw,dq.
8. asean.tw,kw,dq.
9. 5 or 6 or 7 or 8
10. (newborn\* or new-born\* or baby or babies or neonat\* or neo-nat\* or infan\* or toddler\* or pre-schooler\* or preschooler\* or kinder or kinders or kindergarten\* or kinder-aged or boy or boys or girl or girls or child or children or childhood or pediatric\* or paediatric\* or adolescen\* or youth or youths or teen or teens or teenage\* or school-age\* or schoolage\* or school-child\* or schoolchild or school-girl\* or schoolgirl\* or school-boy\* or schoolboy\*).af.
11. 4 and 9 and 10
12. limit 11 to English language
13. limit 12 to (conference abstract or conference paper or "conference review" or editorial or letter)
14. 12 not 13

## PubMed

#1

(cholecalciferol\* OR colecalciferol\* OR Hydroxyvitamin-D\* OR calcifediol\* OR calciferol\* OR ergocalciferol\* OR vitamin-d\* OR avitaminosis-d\* OR Hydroxycholecalciferol\* OR Dihydroxycholecalciferol\* OR Dihydroxyvitamin-D\* OR Dihydrotachysterol\*) [MESH]

#2

(South-east-asia OR southeast-asia OR south-eastern-asia OR southeastern-asia OR brunei OR burma OR cambodia OR east-timor OR indonesia OR indochina OR indochine\* OR lao\* OR laos OR malaysia OR mekong OR myanmar OR singapore OR thailand OR timor-leste OR vietnam OR viet-nam OR asean) [MESH]

#3

(newborn\* OR new-born\* OR baby OR babies OR neonat\* OR neo-nat\* OR infan\* OR toddler\* OR pre-schooler\* OR preschooler\* OR kinder OR kinders OR kindergarten\* or kinder-aged OR boy OR boys OR girl OR girls OR child OR children OR childhood OR pediatric\* OR paediatric\* OR adolescen\* OR youth OR youths OR teen OR teens OR teenage\* OR school-age\* OR schoolage\* OR school-child\* OR schoolchild\* OR school-girl\* OR schoolgirl\* OR school-boy\* OR schoolboy\*) [MESH]

#4

(NOTNLM OR publisher[sb] OR inprocess[sb] OR pubmednotmedline[sb] OR indatareview[sb] OR pubstatusaheadofprint)

#5

(#1 AND #2 AND #3 AND #4)

#6

Limit to (English[lang])

As seen on Pubmed

(cholecalciferol\* OR colecalciferol\* OR Hydroxyvitamin-D\* OR calcifediol\* OR calciferol\* OR ergocalciferol\* OR vitamin-d\* OR avitaminosis-d\* OR Hydroxycholecalciferol\* OR Dihydroxycholecalciferol\* OR Dihydroxyvitamin-D\* OR Dihydrotachysterol\*) AND (South-east-asia OR southeast-asia OR south-eastern-asia OR southeastern-asia OR brunei OR burma OR cambodia OR east-timor OR indonesia OR indochina OR indochine\* OR lao OR laos OR malaysia OR mekong OR myanmar OR singapore OR thailand OR timor-leste OR vietnam OR viet-nam OR asean) AND (newborn\* OR new-born\* OR baby OR babies OR neonat\* OR neo-nat\* OR infan\* OR toddler\* OR pre-schooler\* OR preschooler\* OR kinder OR kinders OR kindergarten\* or kindergarten OR boy OR boys OR girl OR girls OR child OR children OR childhood OR pediatric\* OR paediatric\* OR adolescen\* OR youth OR youths OR teen OR teens OR teenage\* OR school-age\* OR schoolage\* OR school-child\* OR schoolchild\* OR school-girl\* OR schoolgirl\* OR school-boy\* OR schoolboy\*) AND (NOTNLM OR publisher[sb] OR inprocess[sb] OR pubmednotmedline[sb] OR indatareview[sb] OR pubstatusaheadofprint)
