# Supplementary material
Source: HighWire-hosted journal article supplement (https://adc.bmj.com/content/archdischild-2021-323765)
Supplement: inline-supplementary-material-2 [file inline-supplementary-material-2.pdf]

**Supplement 2. Summary: Risk of Bias using the bias tool by Hoy and colleagues [18] for prevalence studies (n=30)**

|                                                                                                                           | <b>Khor GL, et al [42]</b> | <b>Poh BK, et al [27]</b> | <b>Nguyen BKL, et al [29]</b> | <b>Rojroongwasinkul N, et al [38]</b> | <b>Soesanti F, et al [34]</b> |
|---------------------------------------------------------------------------------------------------------------------------|----------------------------|---------------------------|-------------------------------|---------------------------------------|-------------------------------|
| <b>External validity</b>                                                                                                  |                            |                           |                               |                                       |                               |
| 1. Was the study's target population a close representation of the national population in relation to relevant variables? | High                       | Low                       | Low                           | Low                                   | High                          |
| 2. Was the sampling frame a true or close representation of the target population?                                        | Low                        | Low                       | Low                           | Low                                   | High                          |
| 3. Was some form of random selection used to select the sample, OR was a census undertaken?                               | Low                        | Low                       | Low                           | Low                                   | High                          |
| 4. Was the likelihood of non-response bias minimal?                                                                       | High                       | High                      | High                          | High                                  | High                          |
| <b>Internal validity</b>                                                                                                  |                            |                           |                               |                                       |                               |
| 5. Were data collected directly from the subjects (as opposed to a proxy)?                                                | Low                        | Low                       | Low                           | Low                                   | Low                           |
| 6. Was an acceptable case definition used in the study?                                                                   | Low                        | Low                       | Low                           | Low                                   | Low                           |
| 7. Was the study instrument that measured the parameter of interest shown to have validity and reliability?               | Low                        | Low                       | Low                           | Low                                   | High                          |
| 8. Was the same mode of data collection used for all subjects?                                                            | Low                        | Low                       | Low                           | Low                                   | Low                           |
| 9. Were the numerator(s) and denominator(s) for the parameter of interest appropriate?                                    | Low                        | High                      | High                          | Low                                   | Low                           |
| 10. Summary item on the overall risk of study bias                                                                        | Low                        | Low                       | Low                           | Low                                   | Moderate                      |
| <b>final assessment</b>                                                                                                   | Low                        | Low                       | Low                           | Low                                   | Moderate                      |

|                                                                                                                           | <b>Poomthavorn P, et al [31]</b> | <b>Sandjaja S, et al [33]</b> | <b>Laillou A, et al [43]</b> | <b>Houghton LA, et al [49]</b> | <b>Reesukumal K, et al [28]</b> |
|---------------------------------------------------------------------------------------------------------------------------|----------------------------------|-------------------------------|------------------------------|--------------------------------|---------------------------------|
| <b>External validity</b>                                                                                                  |                                  |                               |                              |                                |                                 |
| 1. Was the study's target population a close representation of the national population in relation to relevant variables? | High                             | Low                           | Low                          | High                           | High                            |
| 2. Was the sampling frame a true or close representation of the target population?                                        | Low                              | Low                           | Low                          | Low                            | Low                             |
| 3. Was some form of random selection used to select the sample, OR was a census undertaken?                               | High                             | High                          | Low                          | Low                            | High                            |
| 4. Was the likelihood of non-response bias minimal?                                                                       | High                             | High                          | High                         | High                           | High                            |
| <b>Internal validity</b>                                                                                                  |                                  |                               |                              |                                |                                 |
| 5. Were data collected directly from the subjects (as opposed to a proxy)?                                                | Low                              | Low                           | Low                          | Low                            | Low                             |
| 6. Was an acceptable case definition used in the study?                                                                   | Low                              | Low                           | Low                          | Low                            | Low                             |
| 7. Was the study instrument that measured the parameter of interest shown to have validity and reliability?               | Low                              | High                          | Low                          | Low                            | Low                             |
| 8. Was the same mode of data collection used for all subjects?                                                            | Low                              | Low                           | Low                          | Low                            | Low                             |
| 9. Were the numerator(s) and denominator(s) for the parameter of interest appropriate?                                    | Low                              | High                          | Low                          | Low                            | Low                             |
| 10. Summary item on the overall risk of study bias                                                                        | Low                              | Moderate                      | Low                          | Low                            | Low                             |
| <b>final assessment</b>                                                                                                   | Low                              | Moderate                      | Low                          | Low                            | Low                             |

|                                                                                                                           | <b>Ernawati F &amp; Budiman B [40]</b> | <b>Senaprom S, et al [39]</b> | <b>Smith G, et al [51]</b> | <b>Poh BK, et al 2016 [37]</b> | <b>Al-Sadat N, et al [44]</b> |
|---------------------------------------------------------------------------------------------------------------------------|----------------------------------------|-------------------------------|----------------------------|--------------------------------|-------------------------------|
| <b>External validity</b>                                                                                                  |                                        |                               |                            |                                |                               |
| 1. Was the study's target population a close representation of the national population in relation to relevant variables? | Low                                    | Low                           | Low                        | Low                            | Low                           |
| 2. Was the sampling frame a true or close representation of the target population?                                        | Low                                    | Low                           | Low                        | Low                            | Low                           |
| 3. Was some form of random selection used to select the sample, OR was a census undertaken?                               | Low                                    | Low                           | Low                        | Low                            | Low                           |
| 4. Was the likelihood of non-response bias minimal?                                                                       | High                                   | High                          | High                       | High                           | High                          |
| <b>Internal validity</b>                                                                                                  |                                        |                               |                            |                                |                               |
| 5. Were data collected directly from the subjects (as opposed to a proxy)?                                                | Low                                    | Low                           | Low                        | Low                            | Low                           |
| 6. Was an acceptable case definition used in the study?                                                                   | Low                                    | Low                           | Low                        | Low                            | Low                           |
| 7. Was the study instrument that measured the parameter of interest shown to have validity and reliability?               | Low                                    | Low                           | Low                        | Low                            | Low                           |
| 8. Was the same mode of data collection used for all subjects?                                                            | Low                                    | Low                           | Low                        | High                           | Low                           |
| 9. Were the numerator(s) and denominator(s) for the parameter of interest appropriate?                                    | Low                                    | Low                           | Low                        | High                           | High                          |
| 10. Summary item on the overall risk of study bias                                                                        | Low                                    | Low                           | Low                        | Low                            | Low                           |
| <b>final assessment</b>                                                                                                   | Low                                    | Low                           | Low                        | Low                            | Low                           |

|                                                                                                                           | <b>Yani F, et al [24]</b> | <b>Nguyen Bao, et al [30]</b> | <b>Loeb M, et al [36]</b> | <b>Chuc DV, et al [22]</b> | <b>Ariyawatkul &amp; Lersbuasin [46]</b> |
|---------------------------------------------------------------------------------------------------------------------------|---------------------------|-------------------------------|---------------------------|----------------------------|------------------------------------------|
| <b>External validity</b>                                                                                                  |                           |                               |                           |                            |                                          |
| 1. Was the study's target population a close representation of the national population in relation to relevant variables? | High                      | Low                           | High                      | High                       | High                                     |
| 2. Was the sampling frame a true or close representation of the target population?                                        | Low                       | Low                           | Low                       | Low                        | Low                                      |
| 3. Was some form of random selection used to select the sample, OR was a census undertaken?                               | Low                       | Low                           | Low                       | Low                        | High                                     |
| 4. Was the likelihood of non-response bias minimal?                                                                       | High                      | High                          | Low                       | High                       | High                                     |
| <b>Internal validity</b>                                                                                                  |                           |                               |                           |                            |                                          |
| 5. Were data collected directly from the subjects (as opposed to a proxy)?                                                | Low                       | Low                           | Low                       | Low                        | Low                                      |
| 6. Was an acceptable case definition used in the study?                                                                   | Low                       | Low                           | High                      | Low                        | Low                                      |
| 7. Was the study instrument that measured the parameter of interest shown to have validity and reliability?               | Low                       | Low                           | Low                       | Low                        | Low                                      |
| 8. Was the same mode of data collection used for all subjects?                                                            | Low                       | Low                           | Low                       | Low                        | Low                                      |
| 9. Were the numerator(s) and denominator(s) for the parameter of interest appropriate?                                    | Low                       | Low                           | Low                       | Low                        | Low                                      |
| 10. Summary item on the overall risk of study bias                                                                        | Low                       | Low                           | Low                       | Low                        | Low                                      |
| <b>final assessment</b>                                                                                                   | Low                       | Low                           | Low                       | Low                        | Low                                      |

|                                                                                                                           | <b>Rahmadhani R ,<br/>et al [45]</b> | <b>Quah SW et al,<br/>[25]</b> | <b>Tanggam H, et al<br/>[47]</b> | <b>Diana A, et al [26]</b> | <b>Oktaria V, et al,<br/>[35]</b> |
|---------------------------------------------------------------------------------------------------------------------------|--------------------------------------|--------------------------------|----------------------------------|----------------------------|-----------------------------------|
| <b>External validity</b>                                                                                                  |                                      |                                |                                  |                            |                                   |
| 1. Was the study's target population a close representation of the national population in relation to relevant variables? | High                                 | Low                            | High                             | High                       | High                              |
| 2. Was the sampling frame a true or close representation of the target population?                                        | Low                                  | Low                            | Low                              | Low                        | Low                               |
| 3. Was some form of random selection used to select the sample, OR was a census undertaken?                               | Low                                  | Low                            | High                             | Low                        | Low                               |
| 4. Was the likelihood of non-response bias minimal?                                                                       | High                                 | Low                            | High                             | Low                        | High                              |
| <b>Internal validity</b>                                                                                                  |                                      |                                |                                  |                            |                                   |
| 5. Were data collected directly from the subjects (as opposed to a proxy)?                                                | Low                                  | Low                            | Low                              | Low                        | Low                               |
| 6. Was an acceptable case definition used in the study?                                                                   | Low                                  | Low                            | Low                              | Low                        | Low                               |
| 7. Was the study instrument that measured the parameter of interest shown to have validity and reliability?               | Low                                  | Low                            | Low                              | Low                        | Low                               |
| 8. Was the same mode of data collection used for all subjects?                                                            | Low                                  | Low                            | Low                              | Low                        | Low                               |
| 9. Were the numerator(s) and denominator(s) for the parameter of interest appropriate?                                    | Low                                  | Low                            | Low                              | Low                        | Low                               |
| 10. Summary item on the overall risk of study bias                                                                        | Low                                  | Low                            | Low                              | Low                        | Low                               |
| <b>final assessment</b>                                                                                                   | Low                                  | Low                            | Low                              | Low                        | Low                               |

|                                                                                                                           | <b>Hussain S&amp; Elnajeh M [32]</b> | <b>Pulungan A, et al [54]</b> | <b>Irwinda R&amp; Andardi B [56]</b> | <b>Oktaria V, et al [23]</b> | <b>Febriani A, et al [68]</b> |
|---------------------------------------------------------------------------------------------------------------------------|--------------------------------------|-------------------------------|--------------------------------------|------------------------------|-------------------------------|
| <b>External validity</b>                                                                                                  |                                      |                               |                                      |                              |                               |
| 1. Was the study's target population a close representation of the national population in relation to relevant variables? | Low                                  | High                          | High                                 | High                         | Low                           |
| 2. Was the sampling frame a true or close representation of the target population?                                        | Low                                  | Low                           | Low                                  | Low                          | Low                           |
| 3. Was some form of random selection used to select the sample, OR was a census undertaken?                               | High                                 | High                          | Low                                  | Low                          | Low                           |
| 4. Was the likelihood of non-response bias minimal?                                                                       | High                                 | High                          | Low                                  | Low                          | Low                           |
| <b>Internal validity</b>                                                                                                  |                                      |                               |                                      |                              |                               |
| 5. Were data collected directly from the subjects (as opposed to a proxy)?                                                | Low                                  | Low                           | Low                                  | Low                          | Low                           |
| 6. Was an acceptable case definition used in the study?                                                                   | Low                                  | Low                           | Low                                  | Low                          | High                          |
| 7. Was the study instrument that measured the parameter of interest shown to have validity and reliability?               | Low                                  | Low                           | Low                                  | Low                          | Low                           |
| 8. Was the same mode of data collection used for all subjects?                                                            | Low                                  | Low                           | Low                                  | Low                          | Low                           |
| 9. Were the numerator(s) and denominator(s) for the parameter of interest appropriate?                                    | High                                 | Low                           | Low                                  | Low                          | High                          |
| 10. Summary item on the overall risk of study bias                                                                        | Low                                  | Low                           | Low                                  | Low                          | Low                           |
| <b>final assessment</b>                                                                                                   | Low                                  | Low                           | Low                                  | Low                          | Low                           |
