# Supplementary material
Source: HighWire-hosted journal article supplement (https://adc.bmj.com/content/archdischild-2021-323765)
Supplement: inline-supplementary-material-3 [file inline-supplementary-material-3.pdf]

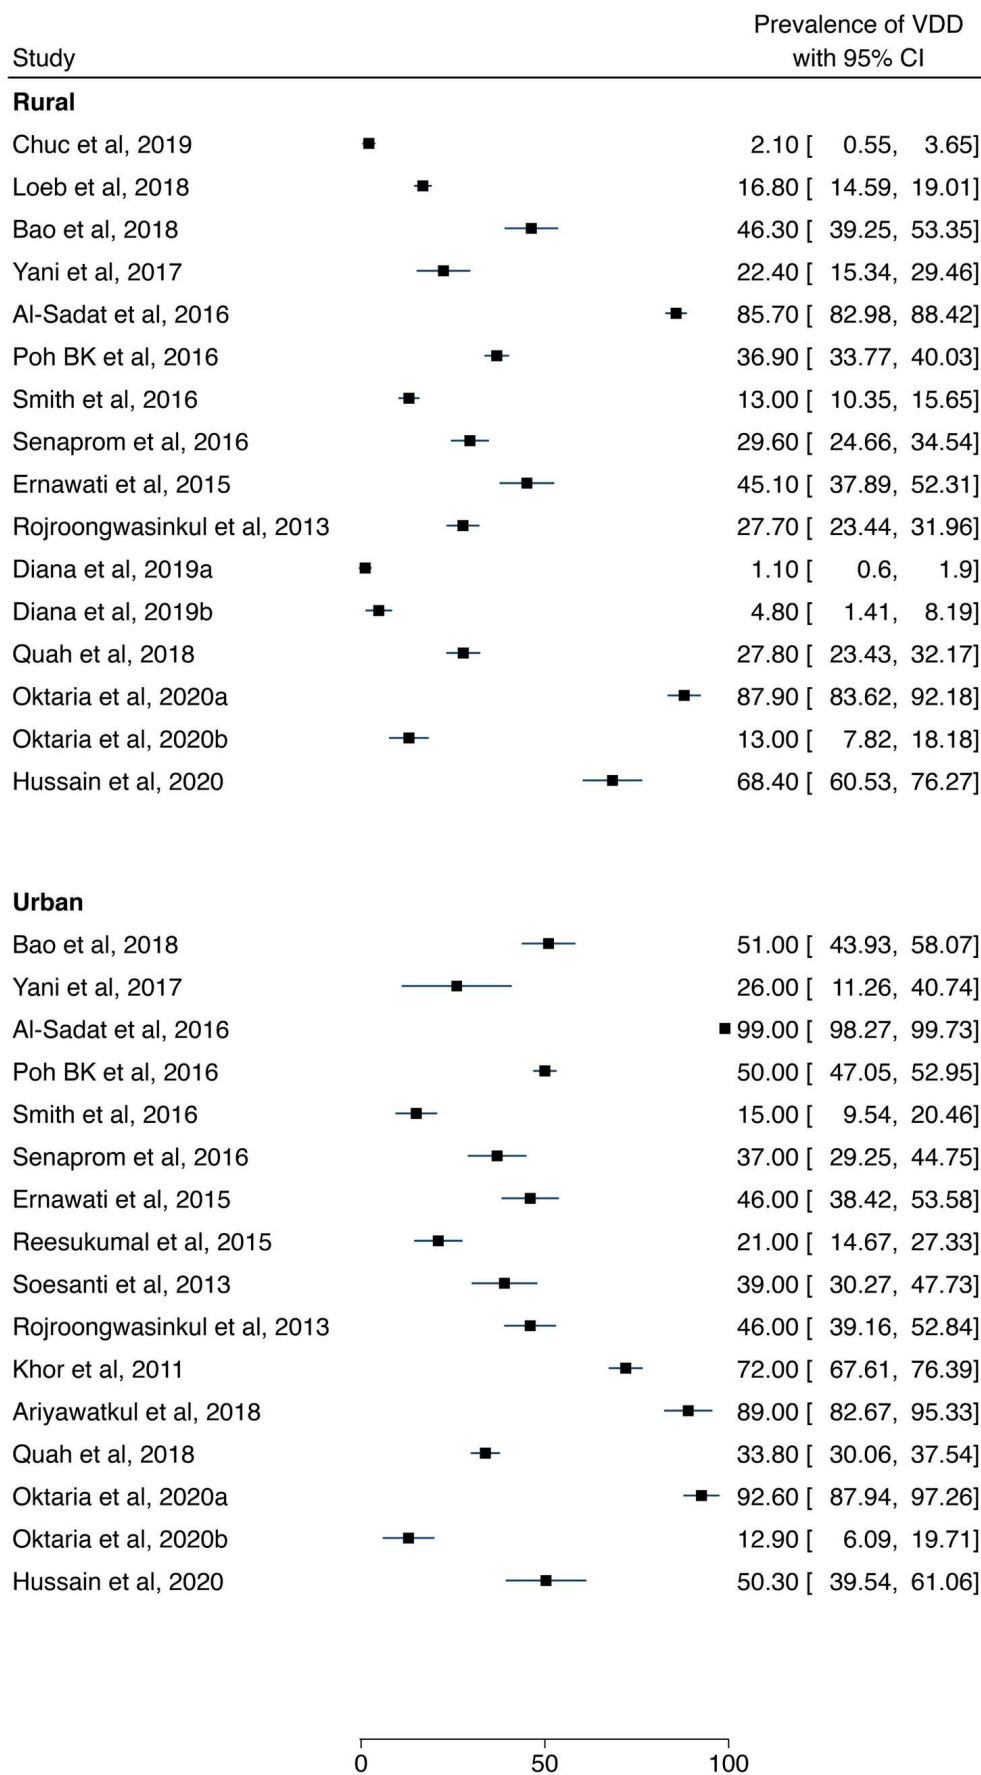

Supplement 3. Subgroup analysis: Vitamin D deficiency in SEA region by residency (n = 9 studies)

VDD: Vitamin-D deficiency; CI: confidence interval, Cohort studies with multiple vitamin D measurements were presented for each measurement (Oktaria et al). The test of group differences for VDD by residency was  $Q_b = 2.74$ , p-value 0.098
