# Supplementary material
Source: HighWire-hosted journal article supplement (https://adc.bmj.com/content/archdischild-2021-323765)
Supplement: inline-supplementary-material-5 [file inline-supplementary-material-5.pdf]

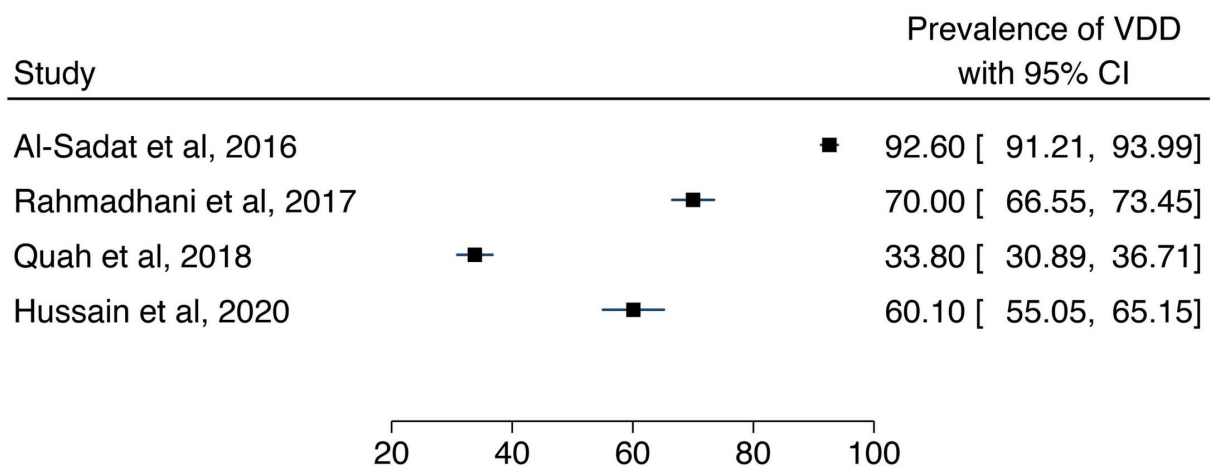

**Supplement 5. Subgroup analysis: Vitamin D deficiency in SEA region by adolescence age (n=4 studies)**

VDD: Vitamin-D deficiency; CI: confidence interval. The test of group differences for VDD by adolescence age was  $Q_b = 5.25$ ,  $p$ -value  $< 0.001$
