# Supplementary material
Source: HighWire-hosted journal article supplement (https://adc.bmj.com/content/archdischild-2021-323765)

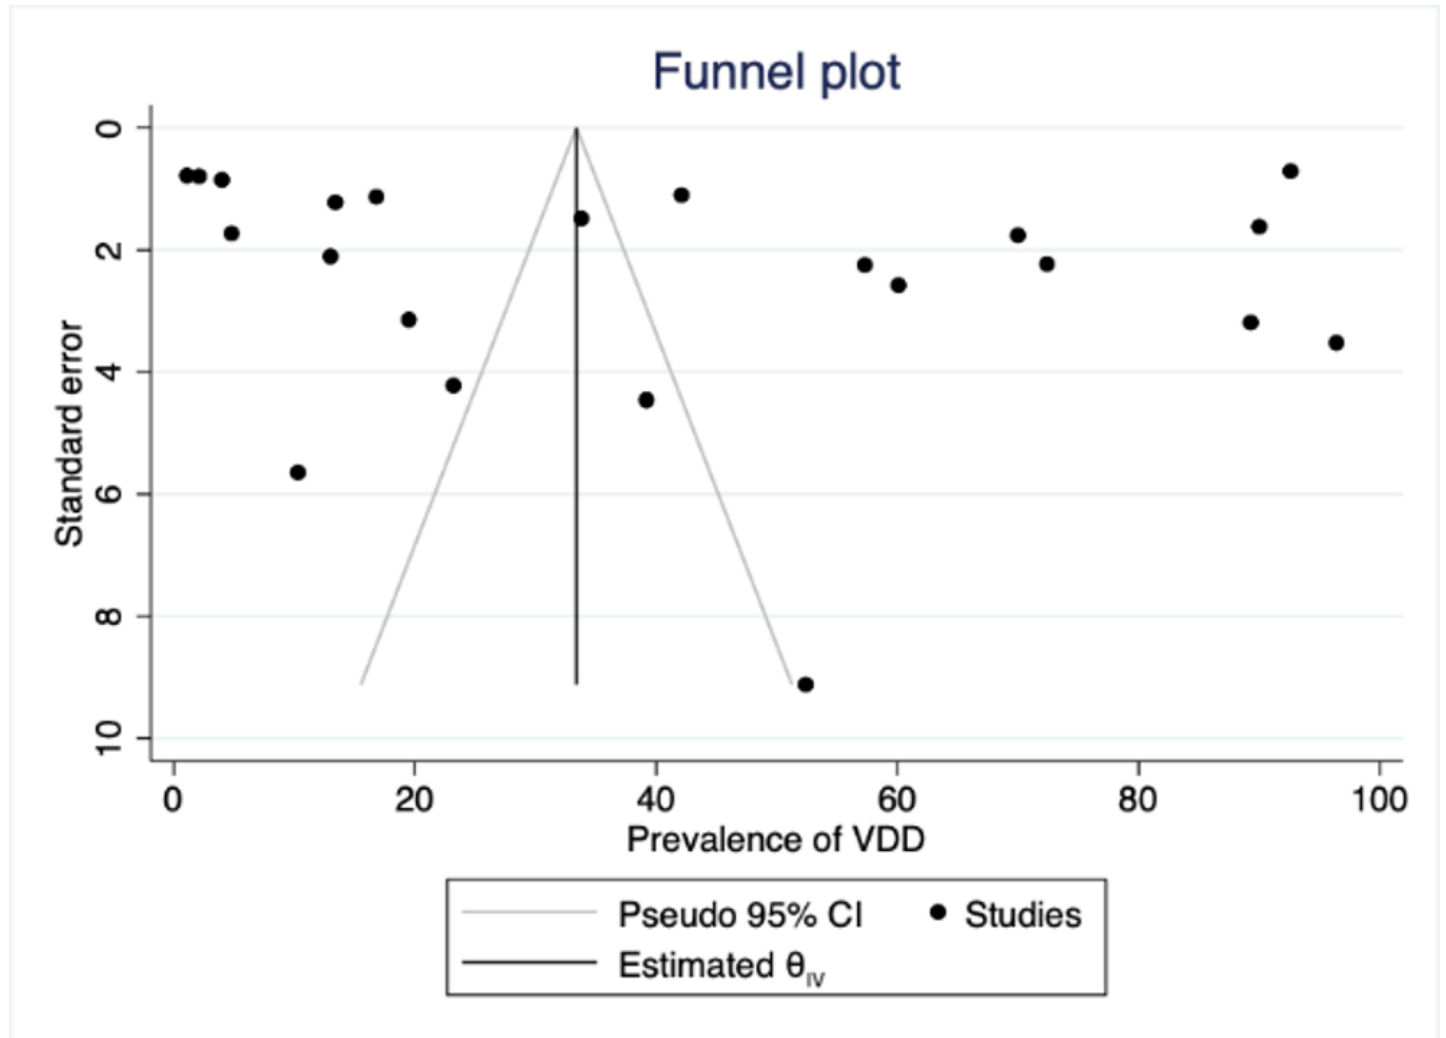

### Supplement 6. Funnel plot: Publication bias for the systematic review

Egger's test ( $P$ : 0.60)

Supplement: inline-supplementary-material-6 [file inline-supplementary-material-6.pdf]
